# Supplementary material
Source: PubMed Central journal article supplement (PMC5518627)
Supplement: NIHMS865819-supplement-1.pdf [file NIHMS865819-supplement-1.pdf]

## Product Code Classifications

| Code | Description                                            | Classification       | Product Code | Description     |
|------|--------------------------------------------------------|----------------------|--------------|-----------------|
|      |                                                        | <i>Brachytherapy</i> |              |                 |
|      | Accelerator Linear Medical                             |                      | KPT          | Calibrator Dos  |
|      | Accessory - Film Dosimetry System                      |                      | ONL          | Conformal Bra   |
|      | Assembly Tube Housing X-Ray Therapeutic                |                      | MOU          | Intravascular R |
|      | Betatron Medical                                       |                      | NAW          | Microspheres I  |
|      | Block Beam-Shaping Radiation Therapy                   |                      | IWF          | Needle Isotope  |
|      | Collimator Dermatological Therapeutic X-Ray            |                      | NMP          | Needle Isotope  |
|      | Collimator High Voltage Therapeutic X-Ray              |                      | PCT          | Prostate Immo   |
|      | Collimator Low Voltage Therapeutic X-Ray               |                      | OIN          | Prostate Seedin |
|      | Collimator Orthovoltage Therapeutic X-Ray              |                      | IWG          | Seed Isotope C  |
|      | Couch Radiation Therapy Powered                        |                      | KXK          | Source Brachy   |
|      | Cyclotron Medical                                      |                      | IXD          | Source Calibra  |
|      | Device Beam Limiting Teletherapy Radionuclide          |                      | IWI          | Source Isotope  |
|      | Device Beam Limiting X-Ray Therapeutic                 |                      | IWA          | Source Wire Ir  |
|      | Dosimeter Ionizing Radiation Implanted                 |                      | IWJ          | System Applic   |
|      | Generator Dermatological (Grenz Ray) Therapeutic X-Ray |                      | JAQ          | System Applic   |
|      | Generator High Voltage X-Ray Therapeutic               |                      |              | Controlled      |
|      | Generator Low Voltage Therapeutic X-Ray                |                      |              |                 |
|      | Generator Orthovoltage Therapeutic X-Ray               |                      |              |                 |
|      | Microtron Medical                                      |                      |              |                 |
|      | Monitor Patient Position Light-Beam                    |                      |              |                 |
|      | Source Teletherapy Radionuclide                        |                      |              |                 |
|      | Synchrotron Medical                                    |                      |              |                 |
|      | System Radiation Therapy Charged-Particle Medical      |                      |              |                 |
|      | System Radiation Therapy Neutron Medical               |                      |              |                 |
|      | System Radiation Therapy Radionuclide                  |                      |              |                 |
|      | System Therapeutic X-Ray                               |                      |              |                 |
|      |                                                        | <i>Software</i>      |              |                 |
|      |                                                        |                      | MUJ          | System Plannin  |
|      |                                                        | <i>Simulation</i>    |              |                 |
|      |                                                        |                      | KPQ          | System Simula   |
