# Supplementary material
Source: PubMed Central journal article supplement (PMC5518627)
Supplement: NIHMS865819-supplement-2.pdf [file NIHMS865819-supplement-2.pdf]

## FDA Determined Cause Classifications†

| Determined Cause                                                                                                                    | Classification                                     | FDA Determined Cause                                                                                    |
|-------------------------------------------------------------------------------------------------------------------------------------|----------------------------------------------------|---------------------------------------------------------------------------------------------------------|
| Component change control                                                                                                            | <i>Other/Under Investigation</i>                   | Other                                                                                                   |
| Component design/selection                                                                                                          |                                                    | Pending                                                                                                 |
| Control/                                                                                                                            |                                                    | Under Investigation by firm                                                                             |
| Device Design                                                                                                                       |                                                    | Unknown/Undetermined by                                                                                 |
| Controlled device change control                                                                                                    | <i>Packaging</i>                                   | Package design/selection                                                                                |
| Employee error                                                                                                                      |                                                    | Packaging                                                                                               |
| Process error                                                                                                                       |                                                    | Packaging change control<br>Packaging process control                                                   |
| Equipment maintenance                                                                                                               | <i>Process</i>                                     | Process change control<br>Process control†                                                              |
| Defect in labeling                                                                                                                  |                                                    | Process design                                                                                          |
| Labeling Change Control                                                                                                             | <i>Software</i>                                    | Software change control                                                                                 |
| Labeling design                                                                                                                     |                                                    | Software design                                                                                         |
| Labeling False and Misleading                                                                                                       |                                                    | Software design (manufacturing)                                                                         |
| Labeling mix-ups                                                                                                                    |                                                    | Software design (manufacturing)                                                                         |
| Labeling incorrect or no expiration date                                                                                            |                                                    | Software Design Change<br>Software in the Use Environment<br>Software Manufacturing/Software Deployment |
| Contaminating Material/Component                                                                                                    | <i>Radiation Control for Health and Safety Act</i> | Radiation Control for Health and Safety Act                                                             |
| Manufacturing material removal                                                                                                      |                                                    |                                                                                                         |
| Material/Component Contamination                                                                                                    |                                                    |                                                                                                         |
| Build-up of materials/components                                                                                                    |                                                    |                                                                                                         |
| Use of Material/Component prior to receiving test results                                                                           |                                                    |                                                                                                         |
| Quality control processes used within quality management systems (QMS) to ensure that changes to a product or system are introduced |                                                    |                                                                                                         |

Developing, conducting, controlling, and monitoring production processes to ensure that a device conforms to its specific characteristics. Determined causes were omitted, as 0% of ROD recalls and <0.4% of other device recalls cited them: Counterfeit, Environmental, Storage, Vendor change control
