# Supplementary material
Source: PubMed Central journal article supplement (PMC5518627)
Supplement: NIHMS865819-supplement-3.pdf [file NIHMS865819-supplement-3.pdf]

**Supplementary Table 1. Product Code Classifications**

| <b>Classification</b> | <b>Product Code</b> | <b>Description</b>                                     | <b>Classification</b> | <b>Product Code</b> | <b>Description</b>                               |
|-----------------------|---------------------|--------------------------------------------------------|-----------------------|---------------------|--------------------------------------------------|
| <i>External Beam</i>  |                     |                                                        | <i>Brachytherapy</i>  |                     |                                                  |
|                       | IYE                 | Accelerator Linear Medical                             |                       | KPT                 | Calibrator Dose Radionuclide                     |
|                       | MWW                 | Accessory - Film Dosimetry System                      |                       | ONL                 | Conformal Brachytherapy Source                   |
|                       | ITZ                 | Assembly Tube Housing X-Ray Therapeutic                |                       | MOU                 | Intravascular Radiation Delivery System          |
|                       | IYG                 | Betatron Medical                                       |                       | NAW                 | Microspheres Radionuclide                        |
|                       | IXI                 | Block Beam-Shaping Radiation Therapy                   |                       | IWF                 | Needle Isotope Gold Titanium Platinum            |
|                       | IYL                 | Collimator Dermatological Therapeutic X-Ray            |                       | NMP                 | Needle Isotope Reprocessed                       |
|                       | IYK                 | Collimator High Voltage Therapeutic X-Ray              |                       | PCT                 | Prostate Immobilizer Rectal Balloon              |
|                       | IYJ                 | Collimator Low Voltage Therapeutic X-Ray               |                       | OIN                 | Prostate Seeding Kit                             |
|                       | IYI                 | Collimator Orthovoltage Therapeutic X-Ray              |                       | IWG                 | Seed Isotope Gold Titanium Platinum              |
|                       | JAI                 | Couch Radiation Therapy Powered                        |                       | KXK                 | Source Brachytherapy Radionuclide                |
|                       | IWK                 | Cyclotron Medical                                      |                       | IXD                 | Source Calibration Sealed Nuclear                |
|                       | IWD                 | Device Beam Limiting Teletherapy Radionuclide          |                       | IWI                 | Source Isotope Sealed Gold Titanium Platinum     |
|                       | KQA                 | Device Beam Limiting X-Ray Therapeutic                 |                       | IWA                 | Source Wire Iridium Radioactive                  |
|                       | NZT                 | Dosimeter Ionizing Radiation Implanted                 |                       | IWJ                 | System Applicator Radionuclide Manual            |
|                       | IYH                 | Generator Dermatological (Grenz Ray) Therapeutic X-Ray |                       | JAQ                 | System Applicator Radionuclide Remote-Controlled |
|                       | KPZ                 | Generator High Voltage X-Ray Therapeutic               |                       |                     |                                                  |
|                       | IYD                 | Generator Low Voltage Therapeutic X-Ray                | <i>Software</i>       |                     |                                                  |
|                       | IYC                 | Generator Orthovoltage Therapeutic X-Ray               |                       | MUJ                 | System Planning Radiation Therapy Treatment      |
|                       | JAE                 | Microtron Medical                                      |                       |                     |                                                  |
|                       | IWE                 | Monitor Patient Position Light-Beam                    | <i>Simulation</i>     |                     |                                                  |
|                       | IWH                 | Source Teletherapy Radionuclide                        |                       | KPQ                 | System Simulation Radiation Therapy              |
|                       | IWM                 | Synchrotron Medical                                    |                       |                     |                                                  |
|                       | LHN                 | System Radiation Therapy Charged-Particle Medical      |                       |                     |                                                  |
|                       | IWL                 | System Radiation Therapy Neutron Medical               |                       |                     |                                                  |
|                       | IWB                 | System Radiation Therapy Radionuclide                  |                       |                     |                                                  |
|                       | JAD                 | System Therapeutic X-Ray                               |                       |                     |                                                  |

**Supplementary Table 2. FDA Determined Cause Classifications‡**

| <b>Classification</b>                | <b>FDA Determined Cause</b>                                                                                                                                                                                 | <b>Classification</b>                              | <b>FDA Determined Cause</b>                                                                                                                                                                      |
|--------------------------------------|-------------------------------------------------------------------------------------------------------------------------------------------------------------------------------------------------------------|----------------------------------------------------|--------------------------------------------------------------------------------------------------------------------------------------------------------------------------------------------------|
| <i>Component</i>                     | Component change control<br>Component design/selection                                                                                                                                                      | <i>Other/Under Investigation</i>                   | Other<br>Pending<br>Under Investigation by firm<br>Unknown/Undetermined by firm                                                                                                                  |
| <i>Device Design/Change Control*</i> | Device Design<br>Finished device change control                                                                                                                                                             | <i>Packaging</i>                                   | Package design/selection<br>Packaging<br>Packaging change control<br>Packaging process control                                                                                                   |
| <i>Employee/Use Error</i>            | Employee error<br>Use error                                                                                                                                                                                 | <i>Process</i>                                     | Process change control<br>Process control†<br>Process design                                                                                                                                     |
| <i>Equipment maintenance</i>         | Equipment maintenance                                                                                                                                                                                       | <i>Software</i>                                    | Software change control<br>Software design<br>Software design (manufacturing process)<br>Software Design Change<br>Software in the Use Environment<br>Software Manufacturing/Software Deployment |
| <i>Labeling</i>                      | Error in labeling<br>Labeling Change Control<br>Labeling design<br>Labeling False and Misleading<br>Labeling mix-ups<br>Incorrect or no expiration date                                                     | <i>Radiation Control for Health and Safety Act</i> | Radiation Control for Health and Safety Act                                                                                                                                                      |
| <i>Material/Component</i>            | Nonconforming Material/Component<br>Manufacturing material removal<br>Material/Component Contamination<br>Mixed-up of materials/components<br>Release of Material/Component prior to receiving test results |                                                    |                                                                                                                                                                                                  |

\* Change control means formal processes used within quality management systems (QMS) to ensure that changes to a product or system are introduced in a controlled and coordinated manner.

† Process control entails developing, conducting, controlling, and monitoring production processes to ensure that a device conforms to its specifications.

‡ For brevity, the following determined causes were omitted, as 0% of ROD recalls and <0.4% of other device recalls cited them: Counterfeit, Environmental control, PMA, Reprocessing Controls, Storage, Vendor change control
